# Supplementary material for: Directionality of the injected current targeting the P20/N20 source determines the efficacy of 140 Hz transcranial alternating current stimulation (tACS)-induced aftereffects in the somatosensory cortex
Source: PubMed Central journal article supplement (PMC8947130; doi:10.1371/journal.pone.0266107), 2022-03-24
Supplement: pone.0266107.s002.pdf [file pone.0266107.s002.pdf]

S1 Table. Number of participants reporting sensations during tACS and sham stimulation

|         | Yes, n (%) | No, n (%) |
|---------|------------|-----------|
| 1) Sham | 11 (37.9)  | 22 (59.5) |
| 2) tACS | 18 (62.1)  | 15 (40.5) |
