# Supplementary material for: Directionality of the injected current targeting the P20/N20 source determines the efficacy of 140 Hz transcranial alternating current stimulation (tACS)-induced aftereffects in the somatosensory cortex
Source: PubMed Central journal article supplement (PMC8947130; doi:10.1371/journal.pone.0266107), 2022-03-24
Supplement: pone.0266107.s003.pdf [file pone.0266107.s003.pdf]

S2 Table. Discrimination tasks performance

| Frequency<br>difference (Hz) | Correct response (%) |               |               |               |
|------------------------------|----------------------|---------------|---------------|---------------|
|                              | Pre-Sham             | Post-Sham     | Pre-tACS      | Post-tACS     |
| 1                            | 55.88 ± 17.70        | 51.76 ± 16.29 | 58.24 ± 15.10 | 48.82 ± 23.15 |
| 2                            | 60.00 ± 16.58        | 66.47 ± 14.98 | 67.06 ± 16.11 | 65.88 ± 15.44 |
| 3                            | 82.94 ± 12.63        | 75.29 ± 18.75 | 73.53 ± 18.35 | 75.29 ± 13.75 |
| 4                            | 84.71 ± 17.72        | 84.12 ± 15.84 | 82.94 ± 16.11 | 75.88 ± 15.02 |
| 5                            | 79.41 ± 16.00        | 80.00 ± 17.68 | 78.82 ± 14.09 | 76.47 ± 16.18 |
| 6                            | 93.53 ± 10.57        | 89.41 ± 17.84 | 86.47 ± 19.02 | 85.29 ± 14.19 |
| 7                            | 90.59 ± 20.15        | 88.24 ± 19.12 | 95.29 ± 9.43  | 89.41 ± 12.98 |
| Easy task                    | 87.06 ± 13.56        | 85.44 ± 14.88 | 85.88 ± 11.72 | 81.76 ± 11.35 |
| Difficult task               | 66.27 ± 12.30        | 64.51 ± 14.24 | 66.27 ± 11.48 | 63.33 ± 12.42 |

Values are presented as mean ± SD. tACS = transcranial alternating current stimulation
