# Supplementary material for: Directionality of the injected current targeting the P20/N20 source determines the efficacy of 140 Hz transcranial alternating current stimulation (tACS)-induced aftereffects in the somatosensory cortex
Source: PubMed Central journal article supplement (PMC8947130; doi:10.1371/journal.pone.0266107), 2022-03-24
Supplement: pone.0266107.s004.pdf [file pone.0266107.s004.pdf]

S3 Table. Individual stimulation intensity in each stimulation condition.

| Participant   | Median Nerve Stimulation (mA) |                  | Tactile Stimulation (mA) |                 |
|---------------|-------------------------------|------------------|--------------------------|-----------------|
|               | tACS                          | Sham             | tACS                     | Sham            |
| P01           | 16.50                         | 18.00            | 3.75                     | 3.75            |
| P02           | 16.50                         | 15.75            | 2.50                     | 2.50            |
| P03           | 15.75                         | 13.50            | 3.75                     | 2.50            |
| P04           | 18.00                         | 16.50            | 2.50                     | 2.50            |
| P05           | 24.00                         | 20.25            | 2.50                     | 3.75            |
| P06           | N/A                           | N/A              | 2.50                     | 2.50            |
| P07           | 12.00                         | 13.50            | 1.25                     | 2.50            |
| P08           | 15.75                         | 15.75            | 2.50                     | 2.50            |
| P09           | 17.25                         | 17.25            | 2.50                     | 2.50            |
| P10           | 14.25                         | 10.50            | 1.25                     | 2.50            |
| P11           | 15.75                         | 12.75            | 2.50                     | 2.50            |
| P12           | 18.00                         | 9.60             | 2.50                     | 2.50            |
| P13           | 23.25                         | 17.25            | 3.75                     | 3.75            |
| P14           | 12.75                         | 15.00            | 2.50                     | 2.50            |
| P15           | 15.00                         | 10.50            | 2.50                     | 2.50            |
| P16           | 14.25                         | 17.25            | 1.25                     | 1.25            |
| P17           | 13.50                         | 12.00            | 3.75                     | 2.50            |
| Mean $\pm$ SD | 16.41 $\pm$ 3.31              | 14.71 $\pm$ 3.08 | 2.57 $\pm$ 0.82          | 2.65 $\pm$ 0.61 |
| t             |                               | 1.50             |                          | -0.30           |
| p             |                               | 0.14             |                          | 0.77            |

Abbreviation: tACS = transcranial alternating current stimulation, mA = milliampere, N/A: not available, SD = standard deviation
