# Supplementary material for: Directionality of the injected current targeting the P20/N20 source determines the efficacy of 140 Hz transcranial alternating current stimulation (tACS)-induced aftereffects in the somatosensory cortex
Source: PubMed Central journal article supplement (PMC8947130; doi:10.1371/journal.pone.0266107), 2022-03-24
Supplement: pone.0266107.s005.pdf [file pone.0266107.s005.pdf]

S4 Table. Relationship between the angular differences (i.e. differences of the stimulation electrode vector and the source orientation vector) and the SEP changes both at the sensor and source space activities

| Condition               | r                  | p     |
|-------------------------|--------------------|-------|
| 1) Sham                 |                    |       |
| P20/N20                 | -0.19              | 0.48  |
| N30/P30                 | 0.06               | 0.83  |
| P20/N30 complex         | -0.06              | 0.82  |
| P20/N20 source activity | -0.08              | 0.76  |
| N30/P30 source activity | -0.05              | 0.85  |
| 2) tACS                 |                    |       |
| P20/N20                 | 0.13               | 0.64  |
| N30/P30                 | -0.32              | 0.22  |
| P20/N30 complex         | -0.21              | 0.44  |
| P20/N20 source activity | -0.63              | 0.01* |
| N30/P30 source activity | -0.57 <sup>^</sup> | 0.02* |

Abbreviation: tACS = transcranial alternating current stimulation. <sup>^</sup> Spearman correlation; \* p <

0.05
