# Supplementary material for: Directionality of the injected current targeting the P20/N20 source determines the efficacy of 140 Hz transcranial alternating current stimulation (tACS)-induced aftereffects in the somatosensory cortex
Source: PubMed Central journal article supplement (PMC8947130; doi:10.1371/journal.pone.0266107), 2022-03-24
Supplement: pone.0266107.s006.pdf [file pone.0266107.s006.pdf]

S5 Table. Relationship between the angular differences (i.e., differences of the stimulation electrode vector and the source orientation vector) and discrimination task performance

| Condition                                                              | r     | p    |
|------------------------------------------------------------------------|-------|------|
| 1) Sham                                                                |       |      |
| Correct response in easy task (%)                                      | 0.25  | 0.35 |
| Correct response in difficult task (%)                                 | 0.23  | 0.39 |
| Correct response difference in easy task relative to baseline (%)      | -.027 | 0.31 |
| Correct response difference in difficult task relative to baseline (%) | -0.07 | 0.81 |
| 2) tACS                                                                |       |      |
| Correct response in easy task (%)                                      | 0.15  | 0.57 |
| Correct response in difficult task (%)                                 | -0.18 | 0.52 |
| Correct response difference in easy task relative to baseline (%)      | -0.28 | 0.29 |
| Correct response difference in difficult task relative to baseline (%) | 0.15  | 0.59 |

Abbreviation: tACS = transcranial alternating current stimulation.
