# Supplementary material for: Directionality of the injected current targeting the P20/N20 source determines the efficacy of 140 Hz transcranial alternating current stimulation (tACS)-induced aftereffects in the somatosensory cortex
Source: PubMed Central journal article supplement (PMC8947130; doi:10.1371/journal.pone.0266107), 2022-03-24
Supplement: pone.0266107.s007.pdf [file pone.0266107.s007.pdf]

S6 Table. Relationship between SEP source activities and discrimination task performance

|                                                                        | P20/N20 source activity |      | N30/P30 source activity |      |
|------------------------------------------------------------------------|-------------------------|------|-------------------------|------|
|                                                                        | r                       | p    | r                       | p    |
| 1) Sham                                                                |                         |      |                         |      |
| Correct response in easy task (%)                                      | -0.12                   | 0.67 | 0.16                    | 0.57 |
| Correct response in difficult task (%)                                 | -0.21                   | 0.44 | -0.07                   | 0.79 |
| Correct response difference in easy task relative to baseline (%)      | 0.05                    | 0.86 | -0.08                   | 0.76 |
| Correct response difference in difficult task relative to baseline (%) | 0.34                    | 0.20 | 0.26                    | 0.34 |
| 2) tACS                                                                |                         |      |                         |      |
| Correct response in easy task (%)                                      | -0.32                   | 0.22 | -0.13                   | 0.62 |
| Correct response in difficult task (%)                                 | -0.05                   | 0.87 | -0.03                   | 0.92 |
| Correct response difference in easy task relative to baseline (%)      | 0.25                    | 0.36 | 0.28                    | 0.29 |
| Correct response difference in difficult task relative to baseline (%) | 0.13                    | 0.63 | -0.18                   | 0.51 |

Abbreviation: tACS = transcranial alternating current stimulation.
